# Supplementary material for: MyT1 Counteracts the Neural Progenitor Program to Promote Vertebrate Neurogenesis
Source: PubMed Central journal article supplement — Cell Rep. 2016 Oct 4;17(2):469–83. doi: 10.1016/j.celrep.2016.09.024 (PMC5067283; doi:10.1016/j.celrep.2016.09.024), 2016-10-04
Supplement: mmc1.pdf [file mmc1.pdf]

**Cell Reports, Volume 17**

**Supplemental Information**

**MyT1 Counteracts the Neural Progenitor Program  
to Promote Vertebrate Neurogenesis**

**Francisca F. Vasconcelos, Alessandro Sessa, Cátia Laranjeira, Alexandre A.S.F. Raposo, Vera Teixeira, Daniel W. Hagey, Diogo M. Tomaz, Jonas Muhr, Vania Broccoli, and Diogo S. Castro**

| MyT1 expression in<br>Ascl1 LoF and GoF microarrays |               |           |                       |                                                           |
|-----------------------------------------------------|---------------|-----------|-----------------------|-----------------------------------------------------------|
|                                                     |               | Linear FC | P value               | Reference                                                 |
| Ascl1<br>LoF                                        | NS cells      | -5.00     | $4.56 \times 10^{-2}$ | Table S7 on<br>Castro et al., 2011                        |
|                                                     | Telencephalon | -2.99     | $1.46 \times 10^{-4}$ | Table S2 on<br>Castro et al., 2011                        |
| Ascl1<br>GoF                                        | NS cells      | 7.08      | $5.76 \times 10^{-5}$ | Table S1 on<br>Raposo et al., 2015                        |
|                                                     | Telencephalon | 1.47      | $2.28 \times 10^{-2}$ | Gohlke et al., 2008<br>Table S3 on<br>Castro et al., 2011 |

**Figure S1. MyT1 expression data from Ascl1 GoF and LoF experiments in mouse embryonic telencephalon and in cultured NS cells (related to Figure 1)**

Ascl1 LoF in telencephalon, DNA arrays on RNA extracted from E13.5 ventral telencephalon of wild-type and Ascl1 knock-out mice (Castro et al. 2011). Ascl1 GoF in telencephalon, DNA arrays on RNA extracted from In utero electroporated E10.5 mouse telencephalon with control or Ascl1-expressing vectors (Castro et al., 2011; Gohlke et al., 2008). Ascl1 LoF in NS cells, DNA arrays on RNA extracted from NS5 cells electroporated with control or bHLH domain of Ascl1 fused to EnR domain expressing vectors (Castro et al., 2011). Ascl1 GoF in NS cells, DNA arrays on NS5 Ascl1-ERT2 cells before and after Tam induction (Raposo et al., 2015). FC, Fold Change.

**Figure S2**

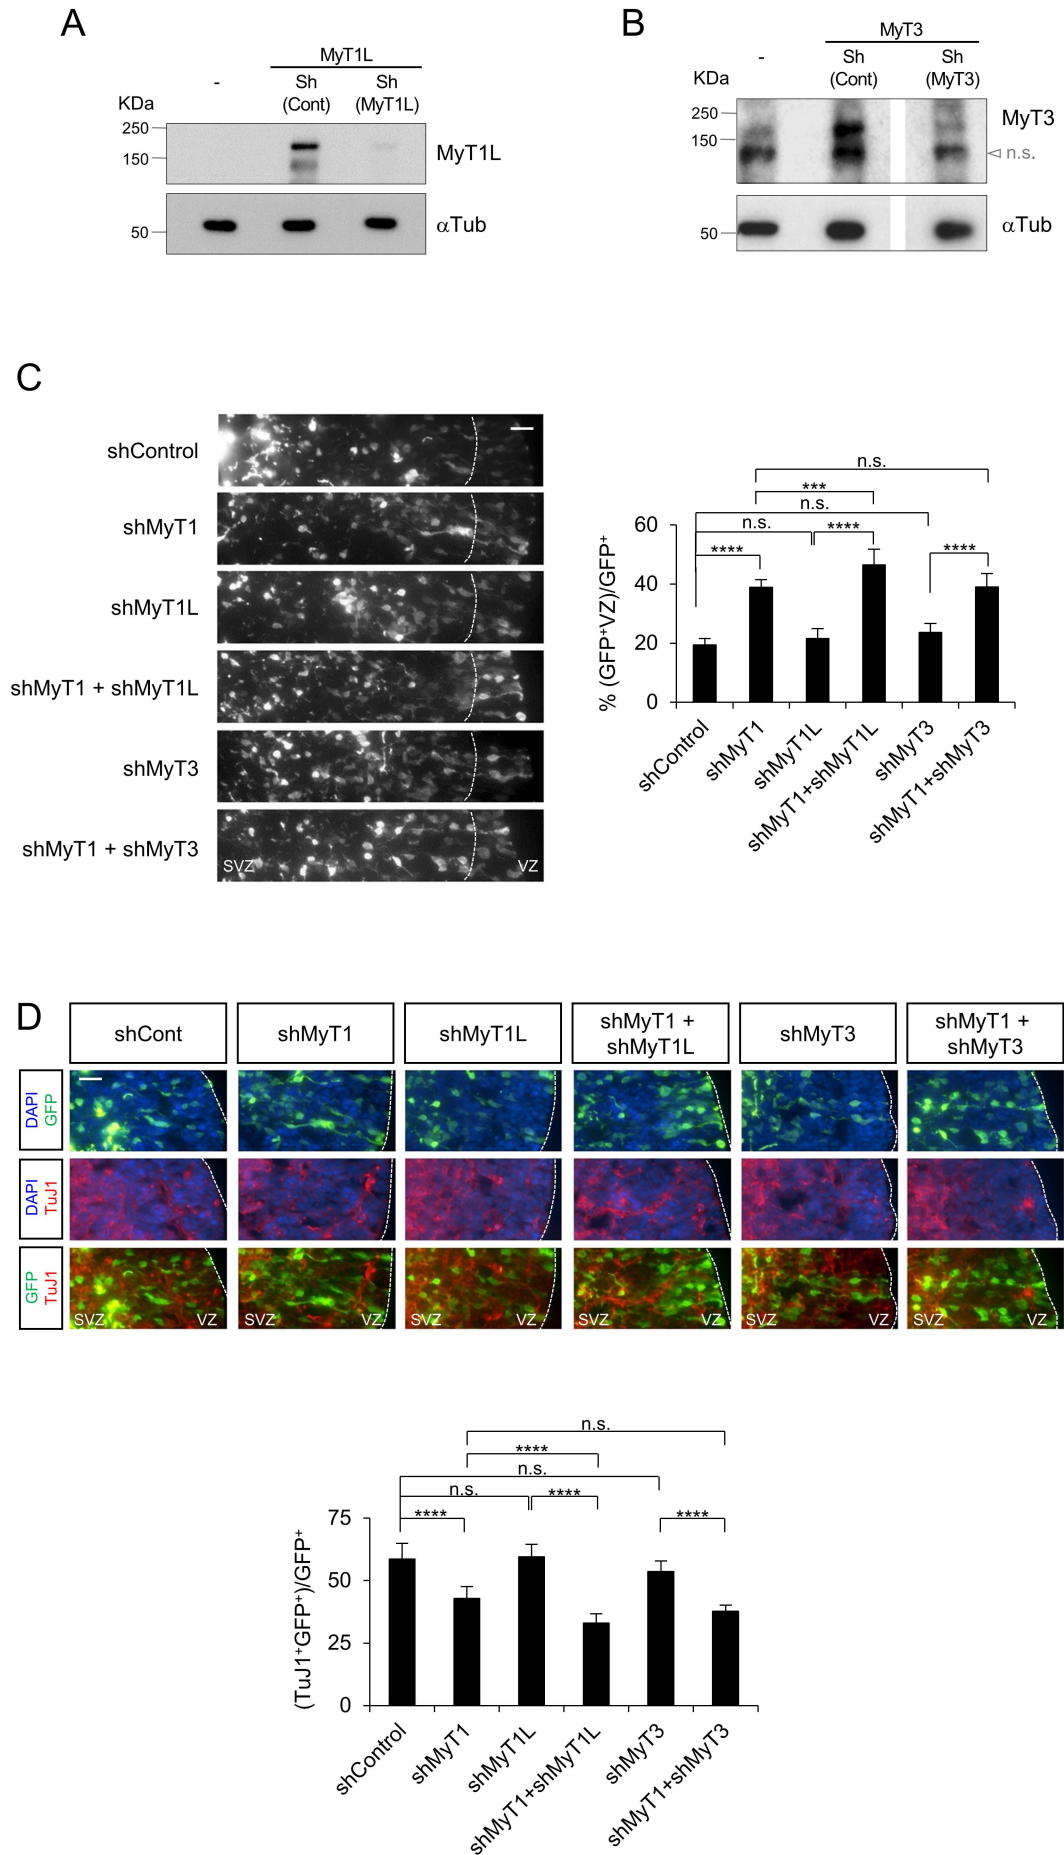

**Figure S2. Combined knock-down of MyT1 family members by in utero electroporation in ventral telencephalon (related to Figure 2)**

Analysis by Western blot of MyT1L **(A)** or MyT3 **(B)** protein levels in P19 cells co-transfected with scramble shRNA (shControl), MyT1L ShRNA (shMyT1L) **(A)** or MyT3 ShRNA (shMyT3) **(B)**.  $\alpha$ -tubulin was used as loading control. n.s.: non-specific band. **(C-D)**

In utero electroporation of control (shControl), MyT1 (shMyT1), MyT1L (shMyT1L) and/or MyT3 (shMyT3) ShRNA vectors in E12.5 mouse ventral telencephalon.

Immunofluorescence analysis on coronal section of the telencephalon for GFP (green or grey) and TuJ1 (red) 2 days post electroporation (E14.5). Cell nuclei are labeled with DAPI (blue). Scale bars, 20 $\mu$ m and 50 $\mu$ m (C and D). VZ: ventricular zone, SVZ: subventricular zone. Histograms represent the quantification of cell migration based on the fraction of GFP<sup>+</sup> cells that are retained in the VZ (GFP<sup>+</sup>VZ/GFP<sup>+</sup>) **(C)** and of neuronal differentiation based on the fraction of GFP<sup>+</sup> cells that express TuJ1 ((TuJ1<sup>+</sup>GFP<sup>+</sup>)/GFP<sup>+</sup>) **(D)**. Mean  $\pm$  SD. n.s. for P>0.05, \* for P<0.05, \*\* for P<0.01, \*\*\* for P<0.001, \*\*\*\* for P<0.0001 according to one-way ANOVA with Bonferroni correction for multiple testing.

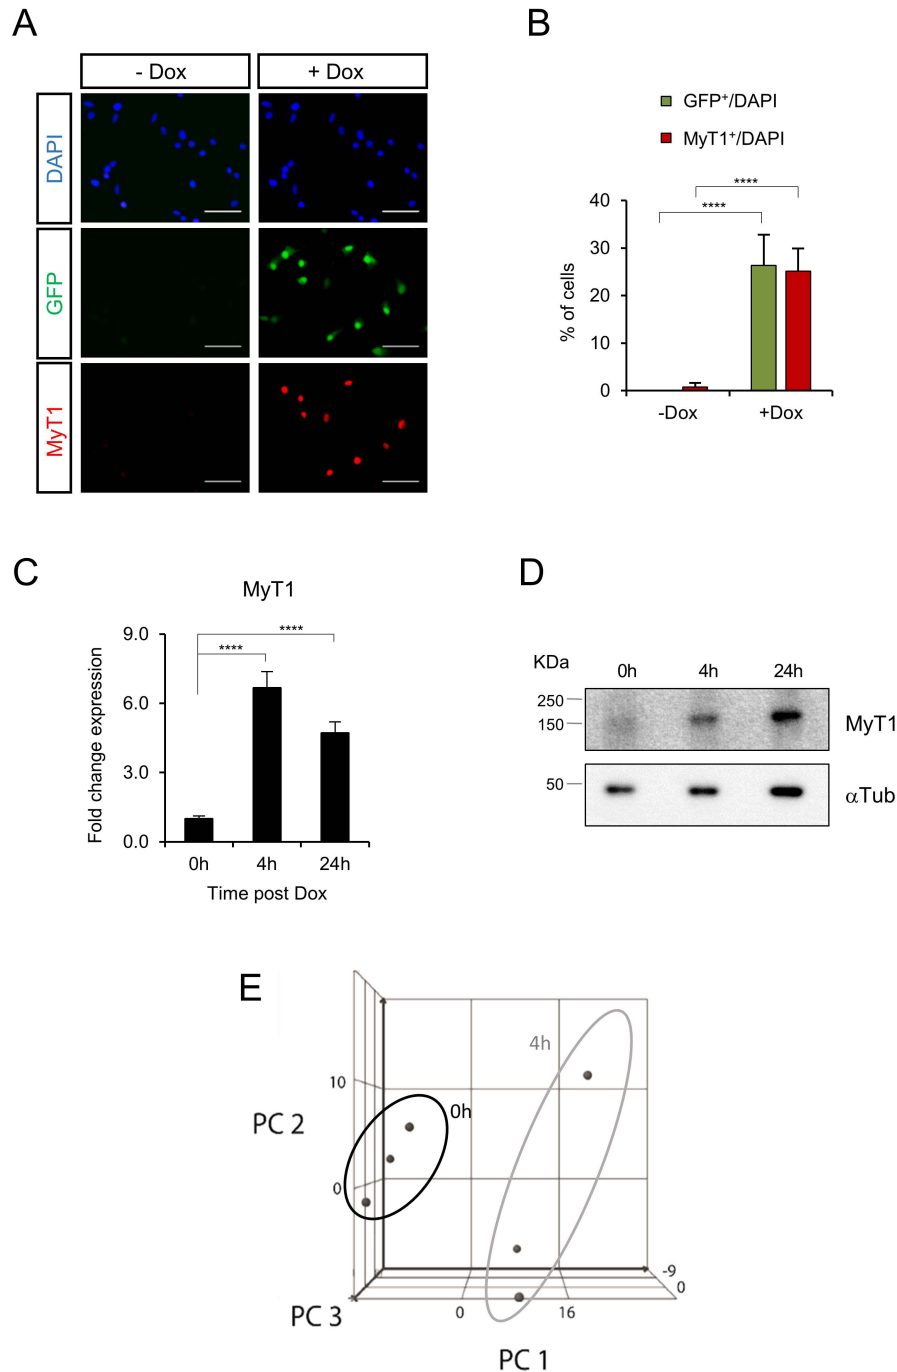

**Figure S3. MyT1 GoF in NS5 cells using a Dox-inducible system (related to Figure 3)**  
**(A)** Immunocytochemistry analysis for MyT1 (red) and GFP (green) before (-Dox) and 24h post Dox (+Dox) addition to NS5 MyT1-HA inducible cell cultures. Nuclei were stained with DAPI (blue). Scale bar, 40µm. **(B)** Histogram represents the percentage of GFP<sup>+</sup> cells (GFP<sup>+</sup>/DAPI) and of MyT1 overexpressing cells (MyT1<sup>+</sup>/DAPI). Mean ± SD for at least 1000 cells on each condition. \*\*\*\* for P<0.0001 according to Student's t-test. **(C)** Analysis of MyT1 RNA expression by qPCR. Mean ± SD of triplicate assays. \*\*\*\* for P<0.0001 according to one-way ANOVA test with Bonferroni correction for multiple testing. **(D)** Analysis of MyT1 protein levels by Western blot post-Dox induction. α-tubulin was used as loading control. **(E)** Principal component analysis (PCA) of technical replicates of MyT1 GoF gene expression DNA arrays 0h and 4h post Dox.

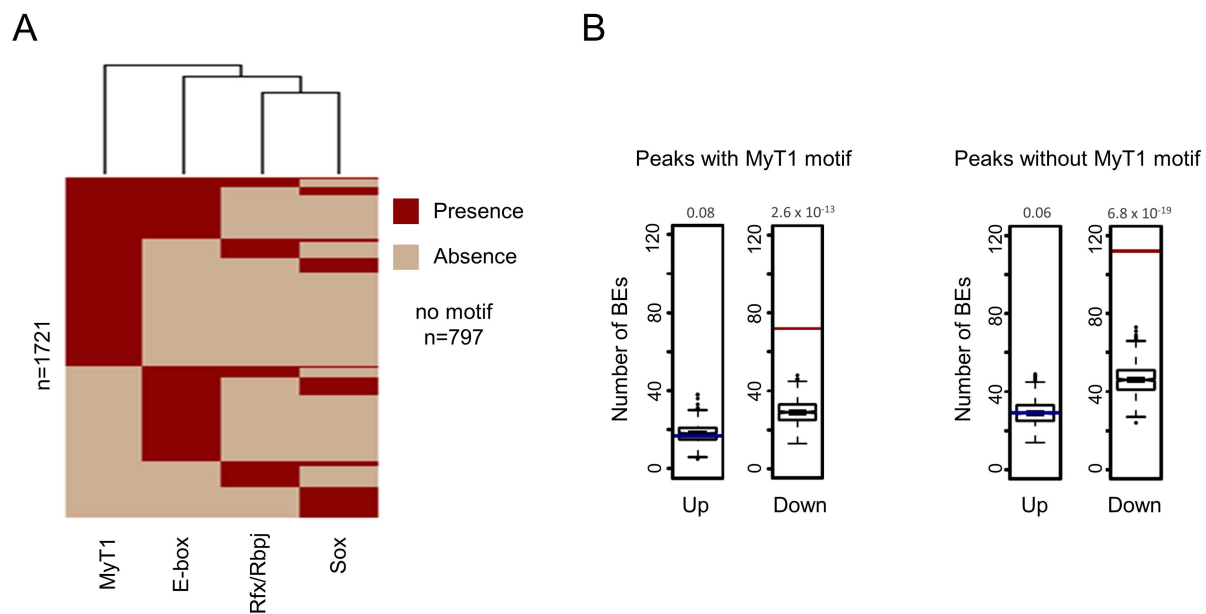

**Figure S4. DNA binding motif analysis of MyT1 binding (related to Figure 3)**

**(A)** Hierarchical clustering of MyT1 peaks based on the presence (red) or absence (tan) of MyT1, E-box, RFX and Sox motifs. **(B)** Number of MyT1 BEs containing (left) or not containing (right) MyT1 motif associated with up- (blue bar) or downregulated (red bar) genes in MyT1 GoF DNA arrays. Test data represented as box with median of test and 1<sup>st</sup> and 3<sup>rd</sup> quartiles; whiskers,  $\pm 1.5 \times \text{IQR}$ . P-values are indicated above each box.

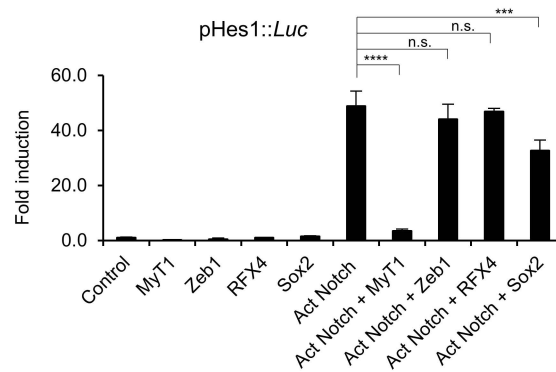

**Figure S5. Control experiments demonstrating specificity of MyT1 inhibition of *Hes1* promoter (related to Figure 5)**

Transcriptional assay in P19 cells co-transfected with control, MyT1, Zeb1, RFX4, Sox2 and/or Act Notch expression vectors and pHes1::Luc. Mean  $\pm$  SD of quadruplicate assays. n.s. for  $P > 0.05$ , \*\*\* for  $P < 0.001$ , \*\*\*\* for  $P < 0.0001$  according to one-way ANOVA test with Bonferroni correction for multiple testing.

Figure S6

A

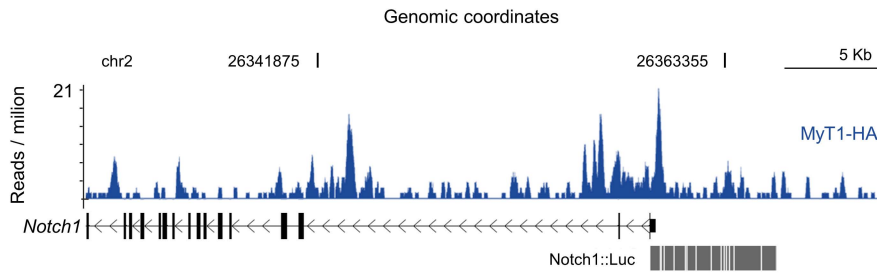

B

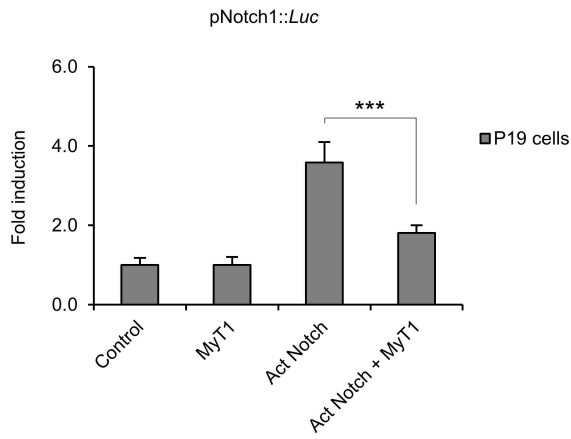

C

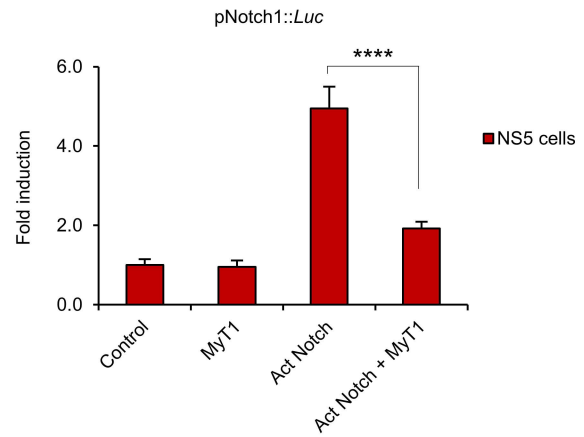

D

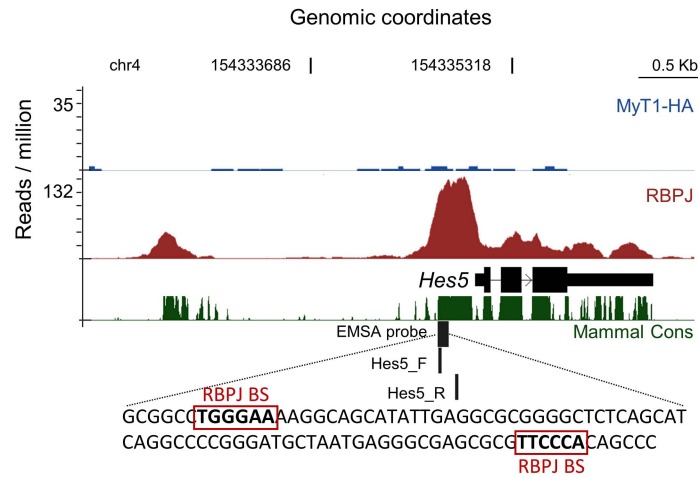

E

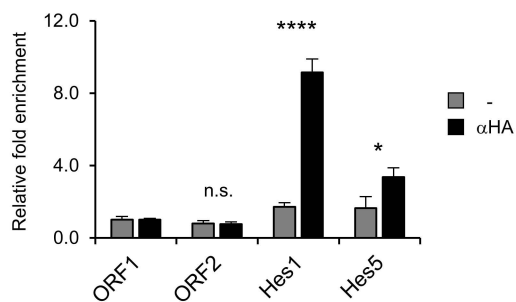

F

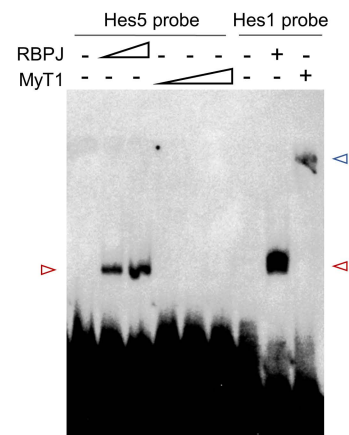



**Figure S6. Analysis of MyT1 binding and regulation of *Notch1* and *Hes5* regulatory regions (related to Figure 7)**

**(A)** MyT1 ChIP-Seq enrichment profiles at vicinity of *Notch1* gene. Genomic region contained in pNotch1::*Luc* (Yashiro-Ohtani et al., 2009) is indicated below figure; white vertical bars represent the position of MyT1 motifs. **(B-C)** Transcriptional assays in P19 cells **(B)** and NS5 cells **(C)** co-transfected with control, MyT1 and/or Act Notch expression vectors and a reporter construct expressing luciferase under the control of *Notch1* proximal promoter region pNotch1::*Luc*. Mean  $\pm$  SD of quadruplicate assays. **(D)** MyT1 (blue) and RBPJ (red) ChIP-Seq enrichment profiles at vicinity of *Hes5* gene. Genomic location of the ChIP-qPCR primers (*Hes5\_F*, *Hes5\_R*) and EMSA probe are indicated. Sequence of *Hes5* EMSA probe and position of RBPJ BSs are indicated below. Green track, Mammal conservation by PhastCons. **(E)** ChIP-qPCR using an anti-HA antibody in NS5 cells upon MyT1 GoF, ORF1 and ORF2, negative control regions. Mean  $\pm$  SD of triplicate assays. **(F)** EMSA testing MyT1 binding to *Hes5* probe. *Hes1* promoter probe and RBPJ-expressing reticulocytes were used as positive controls. Blue arrowhead indicates MyT1 binding to *Hes1* probe. Red arrowheads indicate RBPJ binding to *Hes1* and *Hes5* probes. Different exposure times for different parts of the same gel are shown. n.s. for  $P > 0.05$ , \* for  $P < 0.05$ , \*\*\* for  $P < 0.001$ , \*\*\*\* for  $P < 0.0001$  according to Student's t-test **(C,E)**.

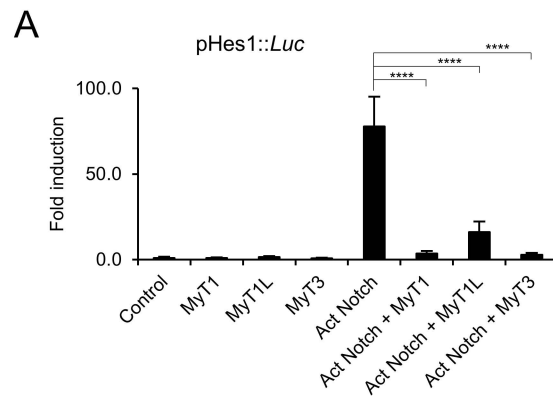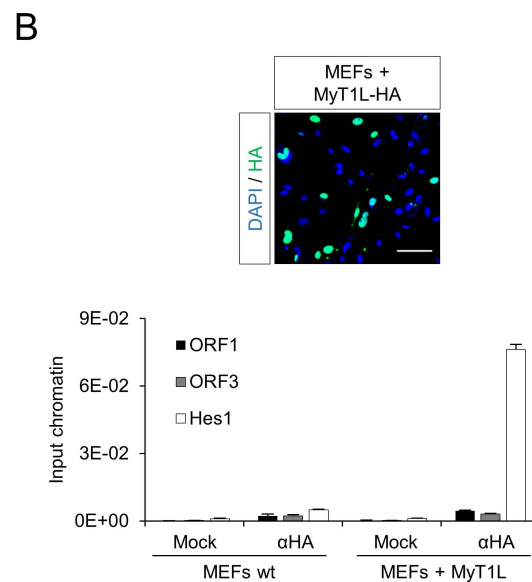

**Figure S7. Functional conservation of Hes1 regulation by MyT1 family members (related to Figure 5)**

**(A)** Transcriptional assay in P19 cells co-transfected with control, MyT1, MyT1L, MyT3 and/or Act Notch expression vectors and pHes1::Luc. Mean  $\pm$  SD of quadruplicate assays. \*\*\*\* for  $P < 0.0001$  according to one-way ANOVA test with Bonferroni correction for multiple testing.

**(B)** Top panel: immunocytochemical analysis with anti-HA in MEFs 48h upon infection with a MyT1L-HA-expressing lentivirus. Bottom panel: analysis of MyT1L-HA binding in the *Hes1* proximal promoter region by ChIP-qPCR in chromatin extracted from MEFs wild-type (not infected) and MEFs MyT1L-HA (48h upon infection). ORF1 and ORF3, negative control regions. Mean  $\pm$  SD of triplicate assays.

## List of Supplemental Tables

**Table S1.** Genes deregulated 4h after MyT1 GoF in NS5 cells (related to Figure 3).

**Table S2.** Genomic coordinates of MyT1-HA binding events determined by CHIP-Seq (related to Figure 3).

**Table S3.** Genes bound and repressed by MyT1 GoF (related to Figure 3).

**Table S4.** Identity of MyT1 target genes associated with enriched Gene Ontology terms (related to Figure 3)

**Table S5.** Expression profiling dataset upon Notch inhibition (related to Figure 5).

**Table S6.** Genomic coordinates of RBPJ binding events determined by CHIP-Seq (related to Figure 7).

## Supplemental experimental procedures

### 1. Plasmids

#### pCAG-MyT1-IRES-GFP

The full-length cDNA of mouse MyT1 was excised from pMycMyT1-7ZF-IRES/Red vector with EcoRI and subcloned (blunt ended) into the EcoRV site of pCAG-LinkerA-IRES-NLS-GFP.

#### MyT1-HA TetON-FUW

An HA-tag encoding oligonucleotide with restriction sites for XhoI and NotI at each end and EcoRI and AgeI sites downstream the HA-tag was inserted into the XhoI and NotI sites of pPyCAG-MCS-MyT1-V5. The EcoRI fragment of MyT1-V5 was subcloned into the EcoRI site of TetON-FUW.

#### FLAG-Act Notch TetON-FUW

Activated Notch1 tagged N-terminally with FLAG-tag was excised from pCAG-IRES-GFP-FLAG-Act Notch with BamHI, and cloned upon Klenow fill in reaction into the EcoRI site of TetON-FUW.

#### MyT1L-HA TetON-FUW

An HA-tag oligonucleotide was inserted into the pCAG-MyT1L by PCR amplification using primers containing the HA-tag, STOP codon, one EcoRI site and one BglII site. The amplified fragment and the pCAG-MyT1L were digested with SacI and BglII. MyT1L-HA was excised from pCAG-MyT1L-HA vector using EcoRI and cloned into TetON-FUW.

#### Site-directed mutagenesis of pHes1::Luc

The mutations on the MyT1 BSs on the Hes1 promoter luciferase reporter (pHes1::Luc) were generated by site-directed mutagenesis using the plasmid pHes1::Luc and the primers listed on the Table S7. PCR reactions were performed with 50nM of each

primer, 100ng of plasmid, 100 $\mu$ M dNTPs, 7.5U of Cloned Pfu polymerase and Pfu buffer with MgSO<sub>4</sub> (Stratagene). Reaction was run under the following cycling conditions: 1 cycle 95°C/5min; 18 cycles (95°C/50sec; 60°C/50sec; 72°C/10min); 1 cycle 72°C/25min, followed by treatment with DpnI for 3-4h at 37°C.

**Table S7** Oligonucleotides used for site-directed mutagenesis of pHes1::*Luc* (related to Figure 5)

| Primer              | Sequence                                       |
|---------------------|------------------------------------------------|
| MyT1_BS1_mut_FW     | CTCTTCCTCCCATTGGCTGAACCCTACTGTGGGAAAGAAAGTTTG  |
| MyT1_BS1_mut_RV     | CAAACCTTTCTTTCCCACAGTAGGGTTCAGCCAATGGGAGGAAGAG |
| MyT1_BS2_mut_FW     | GAAAGTTACTGTGGGAAAGAACCATTGGGAAGTTTTCACACGAGCC |
| MyT1_BS2_mut_RV     | GGCTCGTGTGAAACTTCCCAATGGTTCTTTCCCACAGTAACTTTC  |
| MyT1_BS3_mut_FW     | GAAAGAAAGTTTGGGAACCTTCACACGAGCCGTTCCG          |
| MyT1_BS3_mut_RV     | CGAACGGCTCGTGTGAAGGTTCCCAAACCTTTCTTTTC         |
| MyT1_BS1+2+3_mut_FW | GAAAGAACCATTGGGAACCTTCACACGAGCCGTTCC           |
| MyT1_BS1+2+3_mut_RV | GAACGGCTCGTGTGAAGGTTCCCAATGGTTCTTTTC           |

## 2. Electromobility shift assay

**Table S8** Oligonucleotides used as EMSA probes (related to Figure 5)

| EMSA probe primers      | Sequence                                                                                  |
|-------------------------|-------------------------------------------------------------------------------------------|
| Hes1_WT_F               | TGGCTGAAAGTTACTGTGGGAAAGAAAGTTTGGGAAGTTTTCACACGAGCC                                       |
| Hes1_WT_R               | GGCTCGTGTGAAACTTCCCAAACCTTTCTTTCCCACAGTAACTTTTCAGCCA                                      |
| Hes1_MyT1_BS1_mut_F     | TGGCTGAACCCTACTGTGGGAAAGAAAGTTTGGGAAGTTTTCACACGAGCC                                       |
| Hes1_MyT1_BS1_mut_R     | GGCTCGTGTGAAACTTCCCAAACCTTTCTTTCCCACAGTAGGGTTTCAGCCA                                      |
| Hes1_MyT1_BS2_mut_F     | TGGCTGAAAGTTACTGTGGGAAAGAACCATTGGGAAGTTTTCACACGAGCC                                       |
| Hes1_MyT1_BS2_mut_R     | GGCTCGTGTGAAACTTCCCAATGGTTCTTTCCCACAGTAACTTTTCAGCCA                                       |
| Hes1_MyT1_BS3_mut_F     | TGGCTGAAAGTTACTGTGGGAAAGAAAGTTTGGGAACCTTCACACGAGCC                                        |
| Hes1_MyT1_BS3_mut_R     | GGCTCGTGTGAAGGTTCCCAAACCTTTCTTTCCCACAGTAACTTTTCAGCCA                                      |
| Hes1_MyT1_BS1+2+3_mut_F | TGGCTGAACCCTACTGTGGGAAAGAACCATTGGGAACCTTCACACGAGCC                                        |
| Hes1_MyT1_BS1+2+3_mut_R | GGCTCGTGTGAAGGTTCCCAATGGTTCTTTCCCACAGTAGGGTTTCAGCCA                                       |
| Hes5_F                  | GCGGCCTGGGAAAAGGCAGCATATTGAGGCGCGGGGCTCTCAGCATCAGGCCCGGGATGCTAATGAGGGCGAGCGGTTCCCACAGCCC  |
| Hes5_R                  | GGGCTGTGGGAACGCGCTCGCCCTCATTAGCATCCCGGGGCTGATGCTGAGAGCCCCGCGCCTCAATATGCTGCCTTTTCCCAGGCCGC |

### 3. Expression q-PCR

**Table S9** Expression real-time PCR primers (related to Figures 1, 3 and 7)

| Gene   | Forward Primer                | Reverse primer                |
|--------|-------------------------------|-------------------------------|
| ActinB | CTAAGGCCAACCGTGAAAAG          | ACCAGAGGCATAGGGACA            |
| Dll1   | GGGCTTCTCTGGCTTCAAC           | TAAGAGTTGCCGAGGTCCAC          |
| GAPDH  | GGGTTCTATAAATACGGACTGC        | CCATTTTGTCTACGGGACGA          |
| Hes1   | TGAAGGATTCCAAAATAAAATTCTCTGGG | CGCCTCTTCTCCTGATAGGCTTTGATGAC |
| Hes5   | AAGTACCGTGGCGGTGGAGAT         | CGCTGGAAGTGGTAAAGCAGC         |
| Id3    | TCATAGACTACATCCTCGACCTTC      | CACAAGTTCCGGAGTGAGC           |
| Lfng   | CCACTCCCACCTAGAGAACCT         | ACTGCGTTCCGCTTGTTT            |
| Lmcd1  | GATCCATCCAAAGAAGTGAA          | TGTCAGCGTAGACCACAGG           |
| MyT1   | GGCCATGCATGAAAATGTACT         | GCAATGGGACATCCAGATAAA         |
| Notch1 | CTGGACCCCATGGACATC            | GGATGACTGCACACATTGC           |
| Olig1  | CAGGCCAGTTCTCCAAG             | GGGAAGATTGGCTGAGGTC           |
| Sox2   | AAGCGCCTTCATGGTATGGTC         | TATAATCCGGGTGCTCCTTC          |
| Tubb3  | GCGCATCAGCGTATACTACAA         | CATGGTTCCAGGTTCCAAGT          |

### 4. ChIP q-PCR

**Table S10** ChIP-qPCR primers (related to Figures 1, 3 and 7)

| Primers          | Forward Primer           | Reverse primer             |
|------------------|--------------------------|----------------------------|
| Dll1 ORF (ORF1)  | GTCTCAGGACCTTCACAGTAG    | GAGCAACCTTCTCCGTAGTAG      |
| Fbxw7 ORF (ORF2) | CTCGTCACATTGGAGAGTGG     | CAGGAGCTTGGTTTCTCAG        |
| Hes1 ORF (ORF3)  | CACTTTCTGCCTTCTGTGGA     | AGAGGATGGAGGAGTCATGG       |
| Hes1             | GGGAAAGAAAGTTTGGGAAGT    | GTTATCAGCACCAGCTCCAG       |
| Hes5             | GGGAAAAGGCAGCATATTGAGGCG | CACGCTAAATTGCCTGTGAATTGGCG |
| Id3              | GAAAGGTTGCCTGGGACA       | GTCTGCGCTGTTTTGTTT         |
| Lfng             | CTCCCCACCACTAAGGAG       | GGAGAGACACACAGGAAGCA       |
| Lmcd1            | ACAGGAAGGGCTGTTACCAT     | CTGTTTGCTCTGTGTCTCTGG      |
| MyT1             | CTGGCAACACAATTCCAAG      | AGGGGTCATGCTGCTTCTAT       |
| Notch1_1         | ATTTGGCCAGAATTTGCATT     | GCGCCACATTTAAACTCCTG       |
| Notch1_2         | CAGACCTGCTTAATTGGCTTC    | GGAGACAGAGAAGGCTCCAG       |
| Olig1            | GTGAACAGTCCCCCTTCTGT     | GCTGCCAAACCTTCAGTCTA       |
| Sox2             | CCGGAAACCCATTTATTCC      | TGCAAACACTCTCTTCTCTGC      |

### 5. Cell culture

P19 and HEK293T cells were transfected by using linear polyethylenimine (PEI) (Sigma-Aldrich) in the proportion of DNA:PEI (w/w) of 1:2.5 for P19 cells and 1:3 for HEK293T cells. Total amount of DNA/cm<sup>2</sup>, 500 ng. Medium was replaced with fresh medium 4-6h after transfection.

Mouse embryonic fibroblasts (MEFs) were isolated from E12.5 embryos. The head, vertebral column (containing the spinal cord), dorsal root ganglia and all internal organs were removed and discarded to ensure the removal of all cells with neurogenic potential from the cultures. The remaining tissue was manually dissociated and incubated 0.25% trypsin (Gibco) for 10-15 min to create a single cell suspension. The cells from each embryo were plated onto a T150 flask with MEF medium (Dulbecco's Modified Eagle Medium (DMEM) (BioWest) / High glucose containing 10% fetal bovine serum (FBS) (BioWest), 2mM-Glutamine (Gibco) and 100U/mL Penicillin/Streptomycin (Gibco)).

## 6. Antibodies

**Table S11** Antibodies used in this study

| Antigen (Species)                     | Working dilution<br>IF: immunofluorescence<br>WB: Western blot | Catalog number | Company / Reference    |
|---------------------------------------|----------------------------------------------------------------|----------------|------------------------|
| GFP (chicken)                         | 1:1000 (IF)                                                    | 06-896         | Millipore              |
| HA-tag (rabbit)                       | 1:1000 (IF)                                                    | ab9110         | Abcam                  |
| MyT1 (rabbit)                         | 1:1000 (IF) ; 1:5000(WB)                                       |                | Wang et al., 2007      |
| MyT1L (guinea pig)                    | 1:1000 (WB)                                                    |                | Tennant et al., 2012   |
| MyT3 (rabbit)                         | 1:2000 (WB)                                                    |                | Guogiang Gu et al.     |
| Sox2 (rabbit)                         | 1:500 (IF)                                                     | AB5603         | Millipore              |
| TubulinB III (mouse)                  | 1:500 (IF)                                                     | MAB1637        | Millipore              |
| Alexa Fluor 488 Goat Anti-Chicken IgG | 1:1000 (IF)                                                    |                | Life Technologies      |
| Alexa Fluor 488 Goat Anti-mouse IgG   | 1:1000 (IF)                                                    |                | Life Technologies      |
| Alexa Fluor 568 Goat Anti-rabbit IgG  | 1:1000 (IF)                                                    |                | Life Technologies      |
| Alexa Fluor 568 Goat Anti-mouse IgG   | 1:1000 (IF)                                                    |                | Life Technologies      |
| $\alpha$ -tubulin (mouse)             | 1:10 000 (WB)                                                  | T6074          | Sigma                  |
| Goat Anti-Rabbit IgG (H+L) Poly-HRP   | 1:4000 (WB)                                                    |                | Jackson ImmunoResearch |
| Donkey Anti-Mouse IgG (H+L) Poly-HRP  | 1:4000 (WB)                                                    |                | Jackson ImmunoResearch |

## 7. Image analysis and fluorescence quantification

All images were treated using ImageJ. The number of DAPI, Sox2-, MyT1-HA-positive cells was quantified using Threshold, Watershed and Analyze particles tools from ImageJ. The number of TuJ1-positive cells was quantified using the Cell Counter plugin from ImageJ. The number of cells counted per condition is mentioned in figures legends. Data is presented as mean  $\pm$  SD.

## 8. Bioinformatics

### Location analysis and expression data integration

MyT1 ChIP-Seq peak overlap with expression data from MyT1 GoF microarrays was calculated and plotted as heat maps with R/Bioconductor packages “genomeIntervals”, “gplots”, and in-house developed scripts.

### Motif finding and Gene Ontology analysis

De novo search for differentially enriched motifs was performed using CisFinder (Sharov and Ko, 2009). Searches were run against a control dataset of identical length located 2Kb upstream (FDR<0.05%; Match threshold for clustering, 0.55). Motif fold enrichment (peaks/control) and percentage of peaks with motif were determined using the abundance tables obtained from CisFinder. Frequency distributions were plotted using the frequency tables obtained with CisFinder upon search within 2000bp regions centered on peak summits. Gene Ontology Biological Process analysis with functional annotation clustering was carried out using DAVID v6.7 (Dennis et al., 2003), using the whole microarray (MoGene 1.0 ST v1) as control (enrichment score (EASE)<0.05; similarity threshold for clustering, 0.8).

### Density plots

ChIP-Seq normalized tag signals were calculated using a 10bp sliding window over the  $\pm$  2kb region around each peak summit to generate the occupancy profiles (in-house developed algorithm). These were plotted as heat maps of signal density using R/Bioconductor packages (<http://www.Rproject.org/> and <http://CRAN.R-project.org/package=gplots>).

### Gene expression analysis

NS5 Ascl1-ERT2 cells were plated in 6-well plates (600 000 cells/ well). Differentiation was induced 24h after plating by reducing EGF concentration to 5ng/mL and by adding 4-hydroxy-tamoxifen (TAM) (Sigma-Aldrich) (50nm). Samples were collected in triplicates 0, 4, 12, 24 and 48h post TAM.

### Gene expression analysis using datasets from embryonic mouse telencephalon

Expression RNA-Seq data sets from single cells isolated from E11.5 mouse cortex are from (Hagey and Muhr, 2014). Analysis of the correlation of MyT1 and Hes1 expression was performed as previously described (Hagey and Muhr, 2014). Expression RNA-Seq data sets from cortical layers of the developing mouse brain at E14.5 are accessible at NCBI GEO database (Fietz et al., 2012), accession GSE38805. Hierarchical clustering of in vivo expression of genes bound and downregulated by MyT1 in culture was performed using distances based on the Pearson's correlation coefficient and plotted as a row-scaled heat map with R/Bioconductor “hclus” and “gplots” packages.

### Hierarchical clustering of motif-containing ChIP-Seq peaks

Hierarchical clustering of ChIP-Seq peaks based on the presence or absence of the represented motifs. MyT1 motif and E-box were searched as consensus motifs. Rfx and Sox motifs were searched as positional weight matrices. Abundance tables obtained with the Cisfinder Search tool (Sharov and Ko, 2009) were converted to binary (1-presence, 0- absence). Only the peaks that have at least one of the motifs

searched are represented. Hierarchical clustering was plotted as heat maps with R/Bioconductor “hclust”, “heatmap” packages.  $P(\text{MyT1 ChIP-Seq}) > 10^{-10}$ .

## 9. Publicly available data sets used in this study

**Table S12** Data sets previously generated used in this study

| Dataset                                                                | Reference              |
|------------------------------------------------------------------------|------------------------|
| Ascl1-ERT2 ChIP-Seq in NS5 Ascl1-ERT2 cells, t=18h                     | Wapinski et al., 2013  |
| H3K27ac ChIP-Seq in NS5 Ascl1-ERT2 cells, t=0h                         | Raposo et al., 2015    |
| H3K4me1 in NS5 Ascl1-ERT2 cells, t=0h                                  | Raposo et al., 2015    |
| H3K4me3 ChIP-Seq in neural progenitor cells                            | Mikkelsen et al., 2007 |
| H3K27me3 ChIP-Seq in neural progenitor cells                           | Mikkelsen et al., 2007 |
| DNAse-Seq in proliferating and differentiating neural progenitor cells | Raposo et al., 2015    |

## 10. Supplemental references

- Castro, D.S., Martynoga, B., Parras, C., Ramesh, V., Pacary, E., Johnston, C., Drechsel, D., Lebel-Potter, M., Garcia, L.G., Hunt, C., Dolle, D., Bithell, A., Ettwiller, L., Buckley, N., Guillemot, F., 2011. A novel function of the proneural factor Ascl1 in progenitor proliferation identified by genome-wide characterization of its targets. *Genes Dev.* 25, 930–45.
- Dennis, G., Sherman, B.T., Hosack, D. a, Yang, J., Gao, W., Lane, H.C., Lempicki, R. a, 2003. DAVID: Database for Annotation, Visualization, and Integrated Discovery. *Genome Biol.* 4, P3.
- Gohlke, J.M., Armant, O., Parham, F.M., Smith, M. V, Zimmer, C., Castro, D.S., Nguyen, L., Parker, J.S., Gradwohl, G., Portier, C.J., Guillemot, F., 2008. Characterization of the proneural gene regulatory network during mouse telencephalon development. *BMC Biol.* 6, 15.
- Hagey, D.W., Muhr, J., 2014. Sox2 Acts in a Dose-Dependent Fashion to Regulate Proliferation of Cortical Progenitors. *Cell Rep.* 9, 1908–1920.
- Raposo, A.A.S.F., Vasconcelos, F.F., Drechsel, D., Marie, C., Johnston, C., 2015. Ascl1 Coordinately Regulates Gene Expression and the Chromatin Landscape during Neurogenesis Article Ascl1 Coordinately Regulates Gene Expression and the Chromatin Landscape during Neurogenesis. *Cell Rep.* 1544–1556.
- Sharov, A.L.A., Ko, M.I.S.H., 2009. Exhaustive Search for Over-represented DNA Sequence Motifs with CisFinder. *DNA Res.* 16, 261–273.
- Yashiro-Ohtani, Y., He, Y., Ohtani, T., Jones, M.E., Shestova, O., Xu, L., Fang, T.C., Chiang, M.Y., Intlekofer, A.M., Blacklow, S.C., Zhuang, Y., Pear, W.S., 2009. Pre-TCR signaling inactivates Notch1 transcription by antagonizing E2A. *Genes Dev.* 23, 1665–1676.
